# Supplementary material for: Quantum Mechanistic Studies of the Oxidation of Ethylene by Rhenium Oxo Complexes
Source: Hindawi journal article supplement (doi:10.1155/2021/7931956), 2021-08-21
Supplement: f1 [file 7931956.f1.docx]

**Supplementary information**

QUANTUM MECHANISTIC STUDIES OF THE OXIDATION OF ETHYLENE BY RHENIUM OXO COMPLEXES

Emmanuel Adu Fosu,a Collins Obuah,a* Louis Hamenu,a Albert Aniagyeib, Michael Kojo Ainoosona and Krishna K. Govenderc,d

*aDepartment of Chemistry, University of Ghana, Legon. bSchool of Basic and Biomedical Sciences, University of Health and Allied Sciences. cDepartment of Chemical Sciences, University of Johannesburg, P. O. Box 17011, Doornfontein Campus, 2028, Johannesburg, South Africa.  dCouncil for Scientific and Industrial Research, National Integrated Cyber Infrastructure, Centre for High Performance Computing, 15 Lower Hope Road, Rosebank, 7700, Cape Town, South Africa. email:* [*cobuah@ug.edu.gh*](mailto:cobuah@ug.edu.gh)*.*

Scheme S1: The proposed concerted addition mechanistic pathway for the reaction of LReO3 (L = O−, Cl− F−, Br, I-, Cp, OH-) with ethylene.

Figure S1: Energy profile diagram for the reaction between ReO4- and ethylene using B3LYP/LACVP* level of theory

Figure S2: Energy profile diagram for the reaction between ReO3Cl and ethylene using B3LYP/LACVP* level of theory

Figure S3: Show the energy diagram for the movement of electrons between the HOMO and LUMO of ReO3Cl and ethylene using B3LYP/LACVP* level of theory.

Figure S4: Show the energy diagram for the movement of electrons between the HOMO and LUMO of ReO3F and ethylene using B3LYP/LACVP* level of theory.

Figure S5: Show the energy diagram for the movement of electrons between the HOMO and LUMO of ReO3Br and ethylene using B3LYP/LACVP* level of theory.

Figure S6: Show the energy diagram for the movement of electrons between the HOMO and LUMO of ReO3I and ethylene using B3LYP/LACVP* level of theory.

Figure S7: Show the energy diagram for the movement of electrons between the HOMO and LUMO of ReO3OH and ethylene using B3LYP/LACVP* level of theory.

Figure S8: Show the energy diagram for the movement of electrons between the HOMO and LUMO of ReO4- and ethylene using B3LYP/LACVP* level of theory.


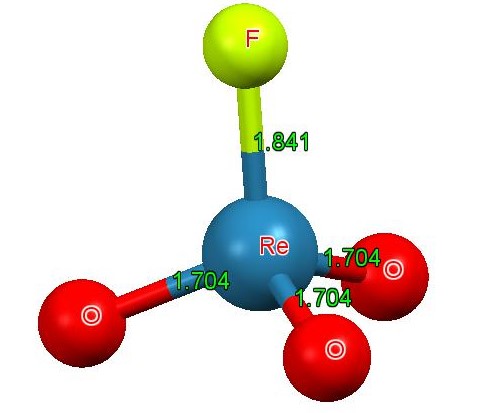

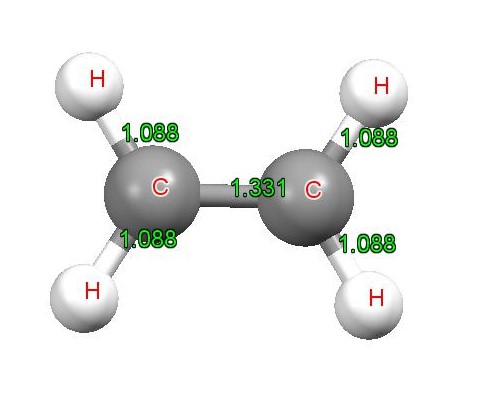

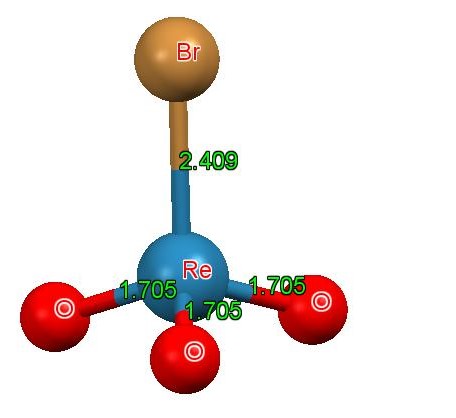

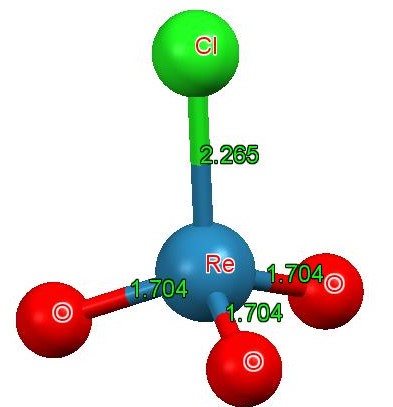

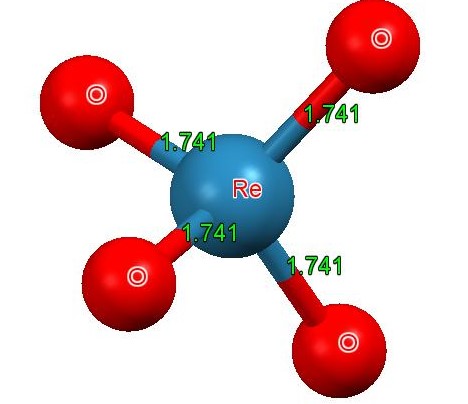

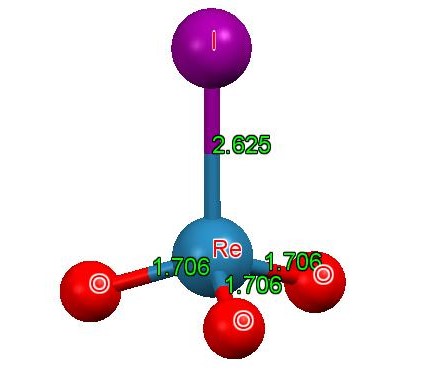

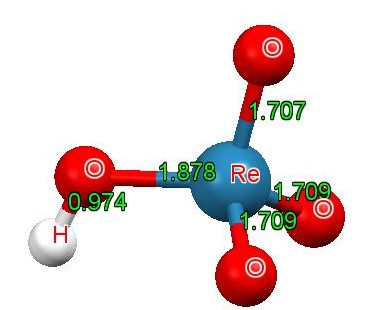


Figure S9: Optimized singlet structures of the reactants involved between LReO3 (L = O-, Cl-, F-, OH-, Br-, I-) and ethene**.**


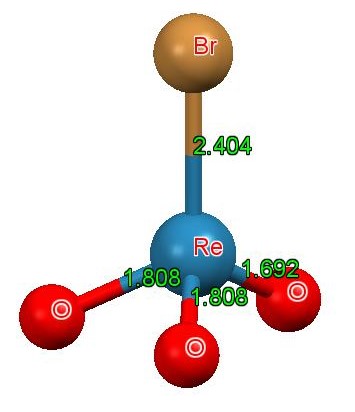

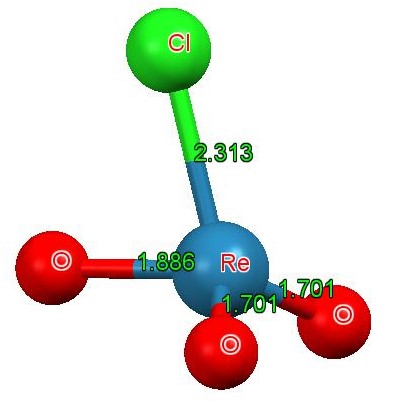

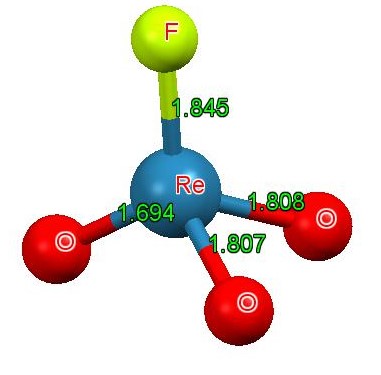

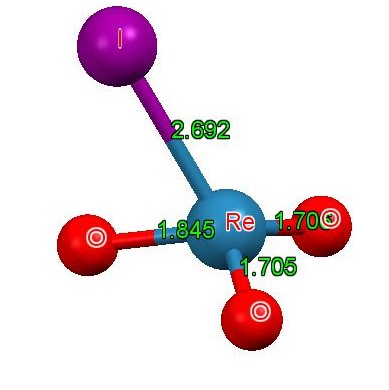

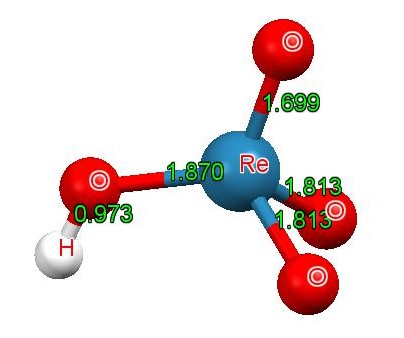

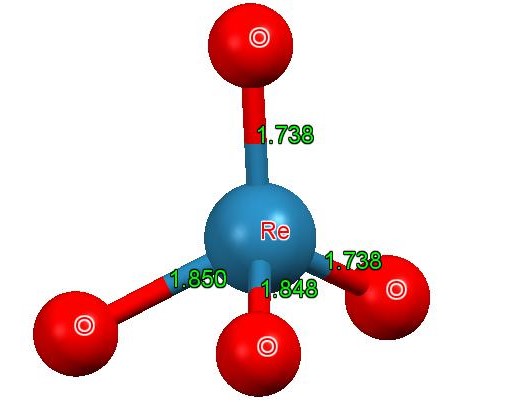


Figure S10: Optimized triplet structures of the reactants involved between LReO3 (L = O-, Cl-, F-, OH-, Br-, I-) and ethene.

**
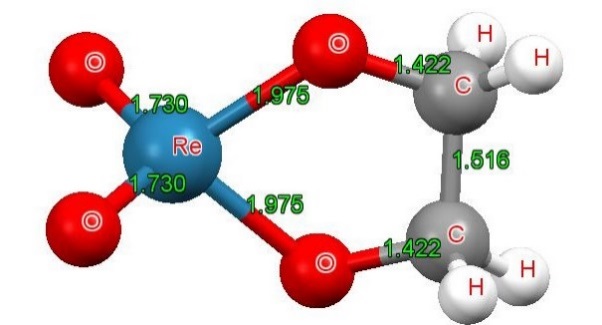

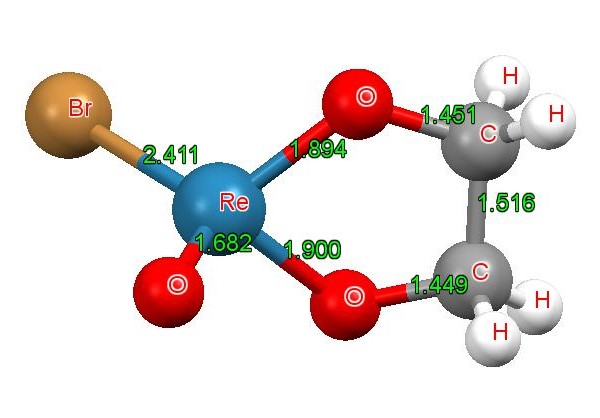

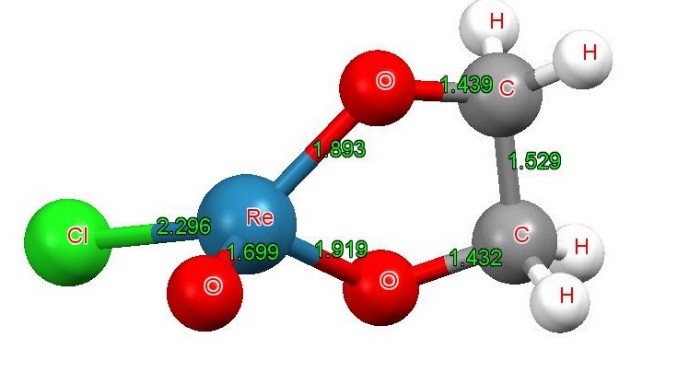

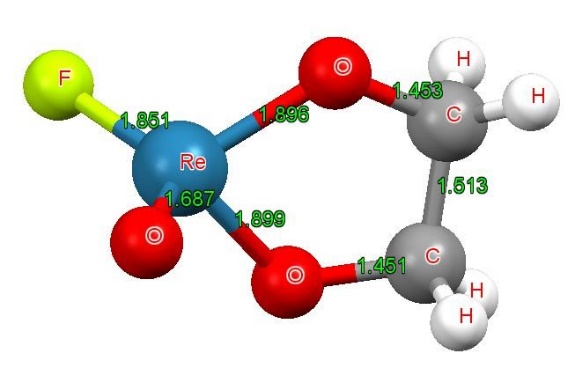

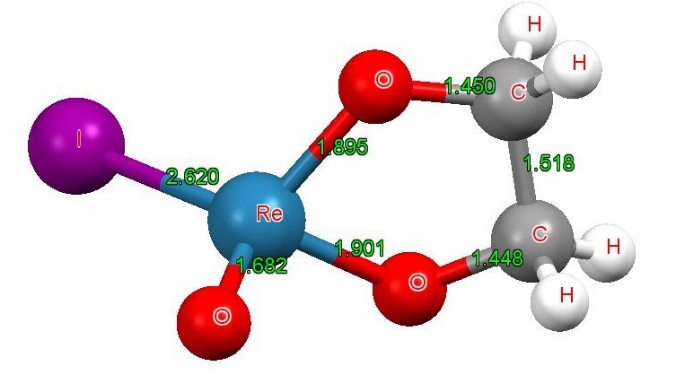

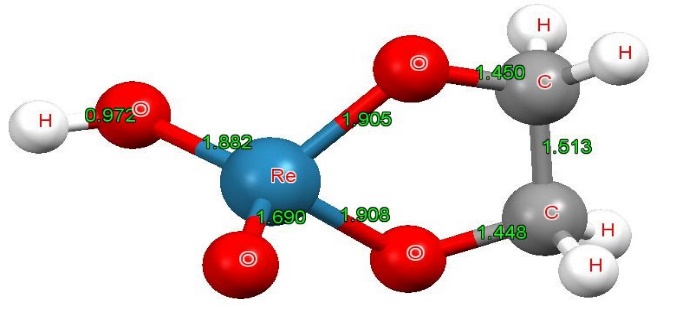
**

Figure S11: Optimized dioxylate involved in the reaction between LReO3 (L = O-, Cl-, F-, OH-, Br-, I-) and ethene on the singlet PES.

**
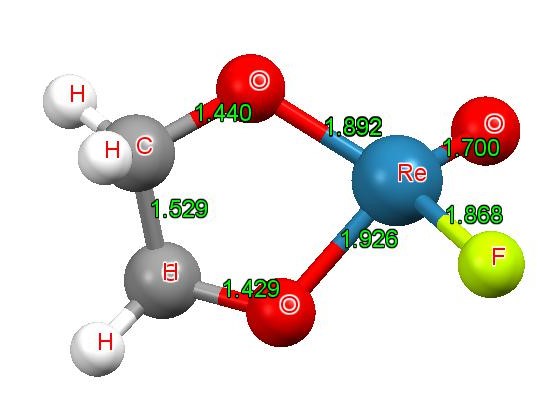

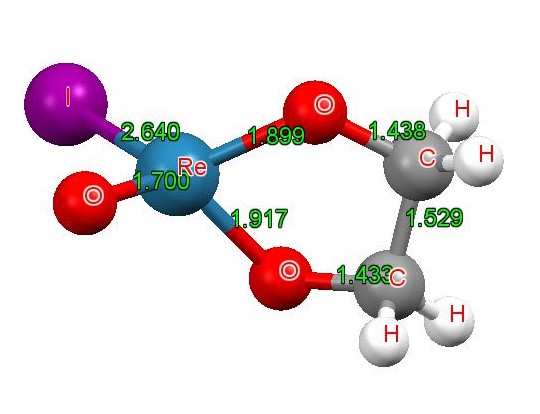

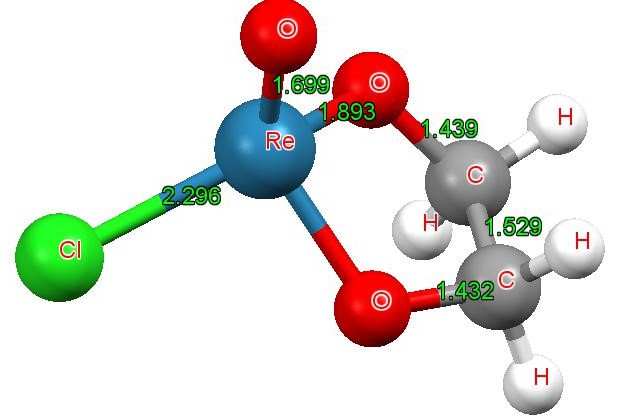

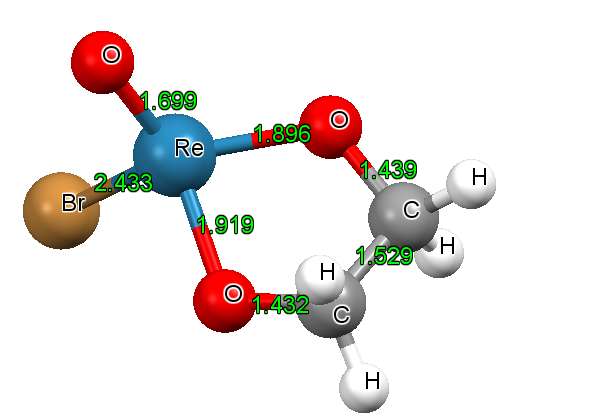

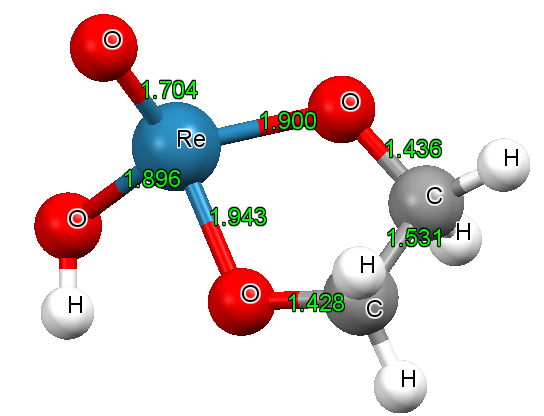
**

Figure S12: Optimized dioxylate of the reaction involved between LReO3 (L = O-, Cl-, F-, OH-, Br-, I-) and ethene on the triplet PES.

**
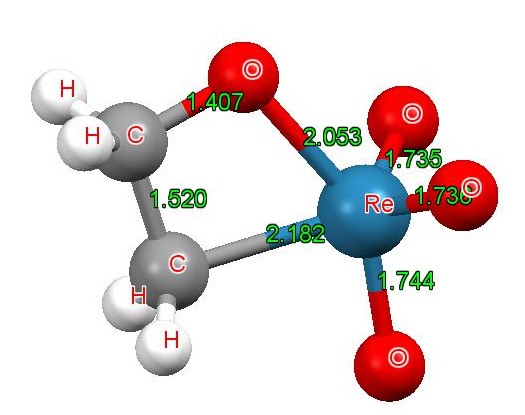

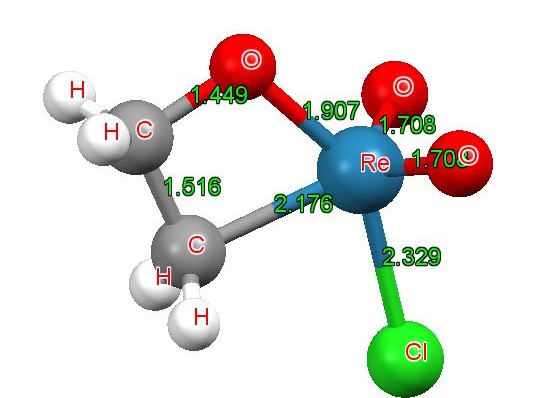

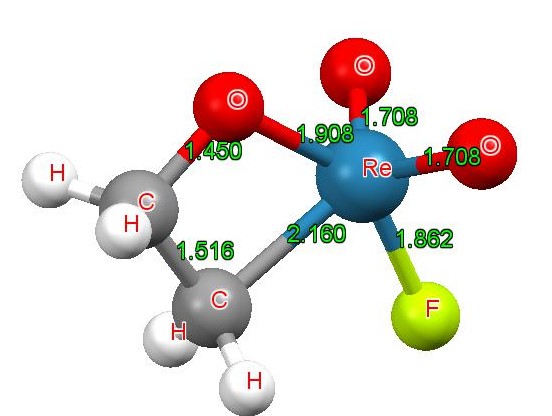

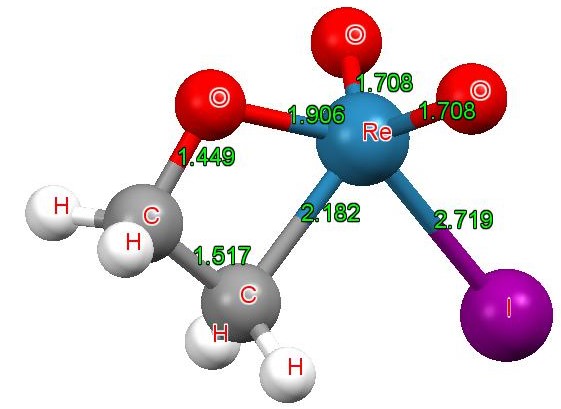

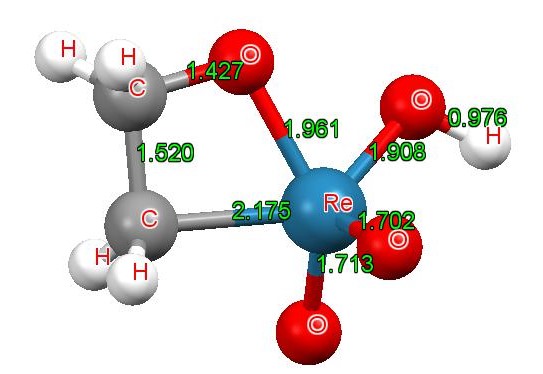

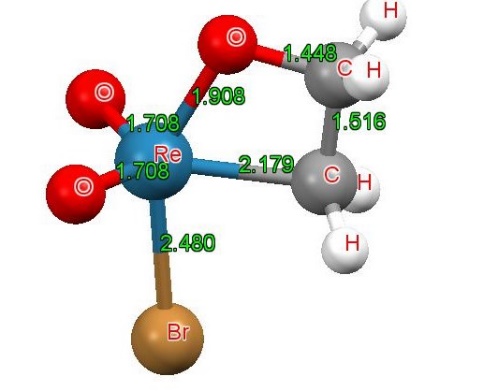
**

Figure S13: Optimized oxetane involved in the reaction between LReO3 (L = O-, Cl-, F-, OH-, Br-, I-) and ethene on the singlet PES.

**
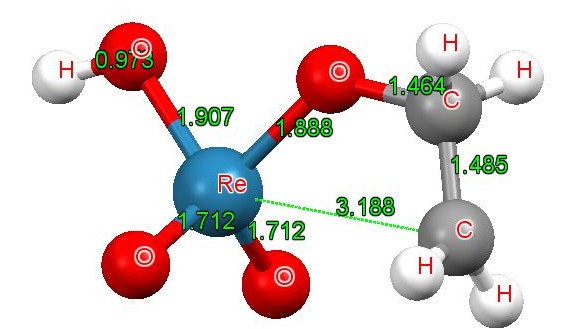

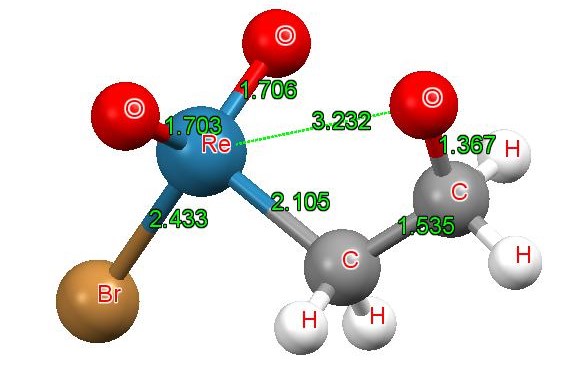

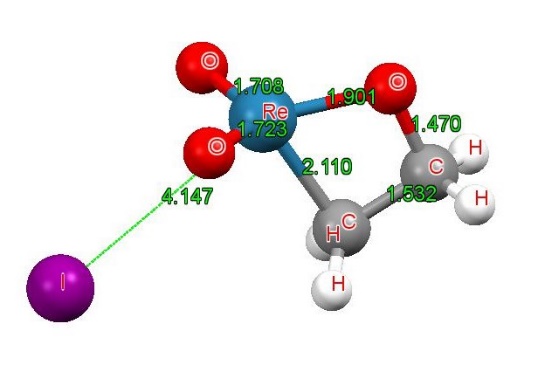
**

**
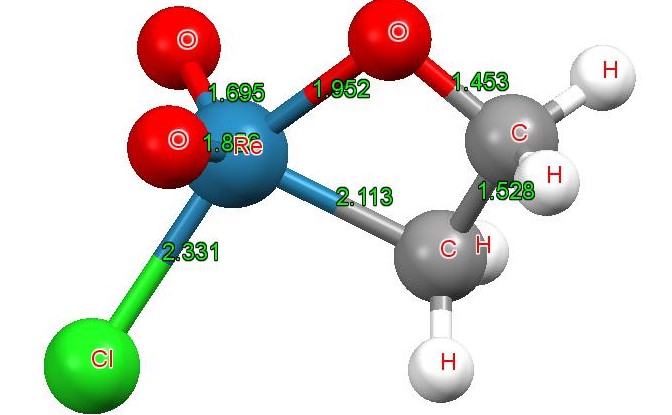

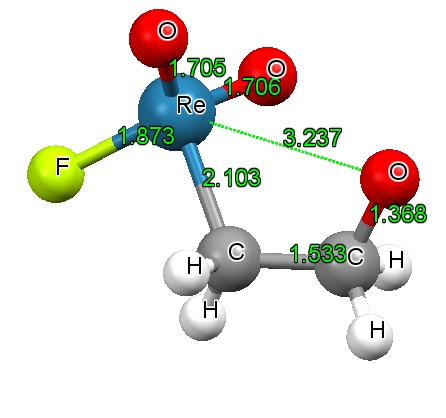
**

Figure S14: Optimized oxetane involved in the reaction between LReO3 (L = O-, Cl-, F-, OH-, Br-, I-) and ethene on the triplet PES.

**
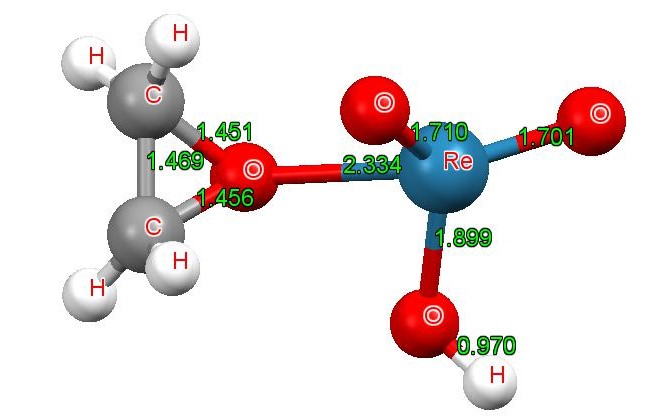

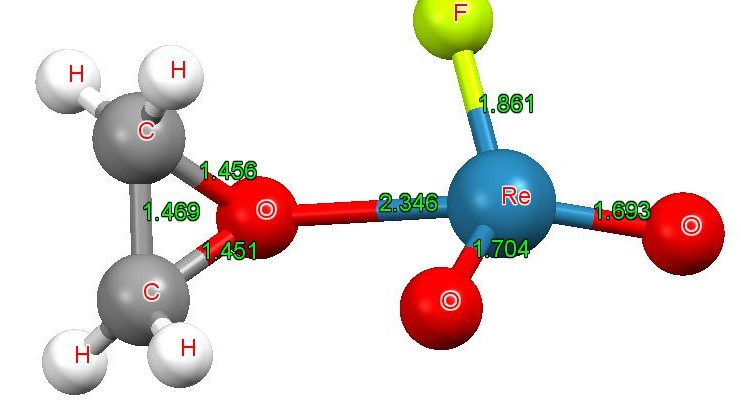
**

**
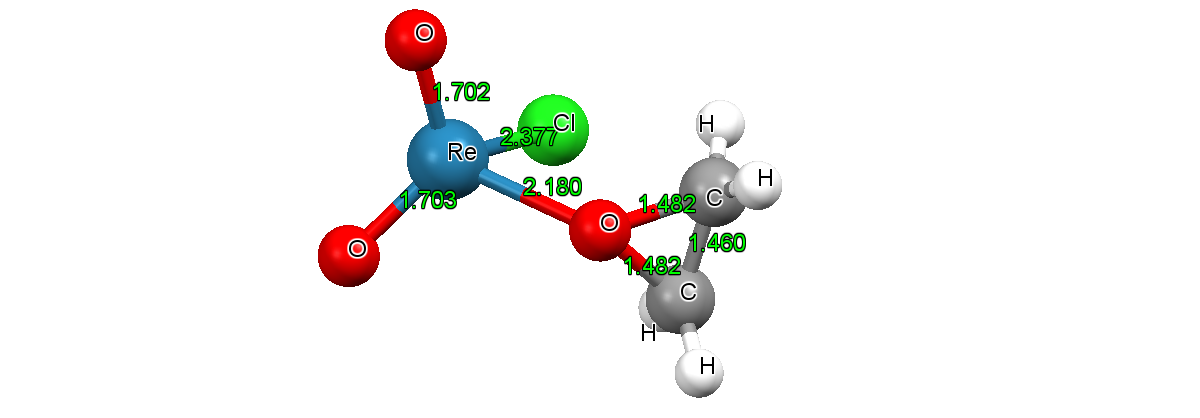
**

Figure S15: Optimized epoxide structures involved in the reaction between LReO3 (L = O-, Cl-, F-, OH-, Br-, I-) and ethene on the singlet PES.

**
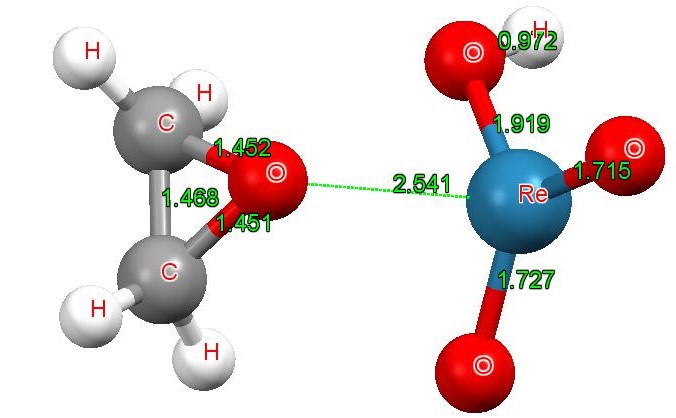

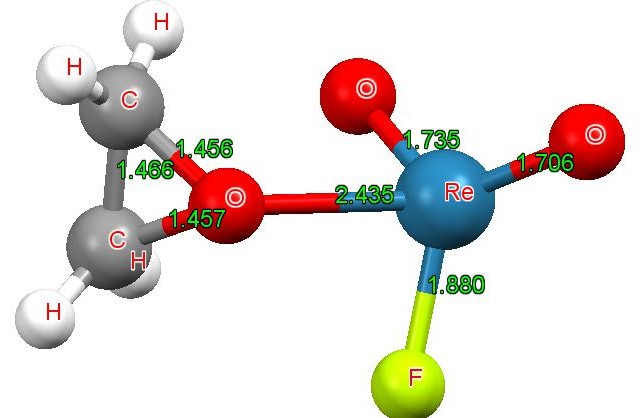
**

**
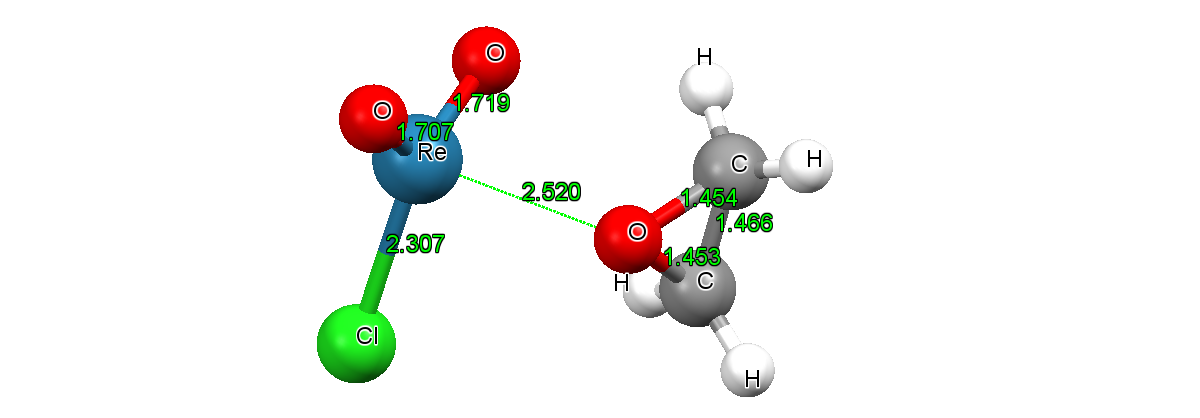
**

Figure S16: Optimized epoxide structures involved in the reaction between LReO3 (L = O-, Cl-, F-, OH-, Br-, I-) and ethene on the triplet PES.
